# Supplementary material
Source: PubMed Central journal article supplement (PMC4261153)
Supplement: NIHMS640420-supplement-1.pdf [file NIHMS640420-supplement-1.pdf]

## Inventory of Supplemental Information

### Supplemental Figures:

**Supplementary Figure 1:** Identification of MAP4K4 as a potential MT-associated focal adhesion disassembly factor. *Related to Figure 1.*

**Supplementary Figure 2:** Deletion of *MAP4K4* inhibits cell motility *in vitro*. *Related to Figure 2.*

**Supplementary Figure 3:** FRAP analysis of WT and *MAP4K4* KO cells. *Related to Figure 3.*

**Supplementary Figure 4:** MT targeting to focal adhesions, Rho activity, and talin activation in keratinocytes. *Related to Figure 4.*

**Supplementary Figure 5:** EB2 knockdown and binding of EB2-cc-CT mutation with MTs. *Related to Figure 5.*

**Supplementary Figure 6:** Endocytosis of  $\beta$ 1-integrin and Arf5 activity in WT and KO cells. *Related to Figure 6.*

**Supplementary Figure 7:** Knockdown expression of *Arf6* and *IQSEC1* in mouse keratinocytes. *Related to Figure 7.*

### Supplemental Video:

**Supplementary video 1:** Focal adhesion dynamics in WT and KO keratinocytes. *Related to Figure 3.*

**Supplementary video 2:** Dynamic localization of EB2 cc-CT mutant. *Related to Figure 5.*

### Supplemental Spreadsheet:

**Supplementary table:** Quantitative analysis of focal adhesion proteome upon nocodazole treatment by SILAC. *Related to Figure 1.*
